# Supplementary material
Source: Springer Nature journal article supplement (https://www.springermedizin.de/resource/supplementary/13000_2011_425_MOESM1_ESM.pdf/9624542)

1000  $\mu\text{m}$

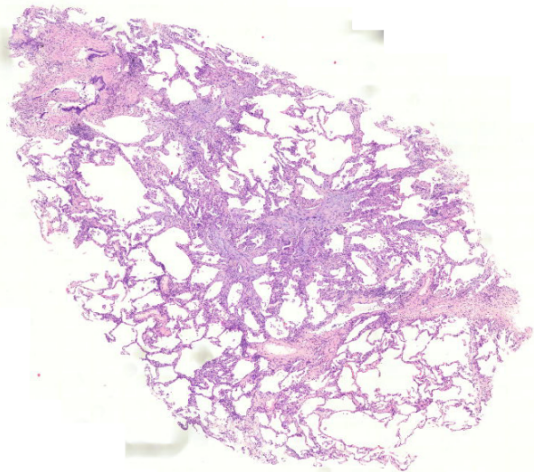

1000  $\mu\text{m}$

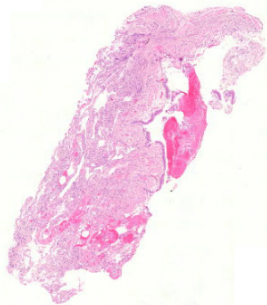

Supplement: MOESM1 [file 9624542]
